# Supplementary material for: Inserting a lithiation potential gap as a factor for degradation control in aluminum-foil anodes by utilizing roll-bonding processes
Source: Royal Society of Chemistry journal article supplement (doi:10.1039/d3ta03687a), 2023-01-01
Supplement: d3ta03687a1.pdf [file d3ta03687a1.pdf]

Supplementary Information

**Inserting a lithiation potential gap as a factor for degradation control in aluminum-foil anodes by utilizing roll-bonding processes**

Hongyi Li,<sup>1\*</sup> Shohei Nishimura,<sup>1</sup> Yuki Nakata,<sup>2</sup> Shingo Matsumoto,<sup>2</sup> Takitaro Yamaguchi,<sup>2</sup> Hiroaki Hoshikawa,<sup>3</sup> Toshiaki Kumagai<sup>3</sup> and Tetsu Ichitsubo<sup>1\*</sup>

<sup>1</sup> *Institute for Materials Research, Tohoku University, Sendai 980-8577, Japan*

<sup>2</sup> *Advanced Materials Development Laboratory, Sumitomo Chemical Co., Ltd., Tsukuba 300-3294, Japan*

<sup>3</sup> *Energy and Functional Materials Research Laboratory, Sumitomo Chemical Co., Ltd., Ehime 792-8521, Japan*

\* Email: [li.hongyi@tohoku.ac.jp](mailto:li.hongyi@tohoku.ac.jp); [tichi@tohoku.ac.jp](mailto:tichi@tohoku.ac.jp)

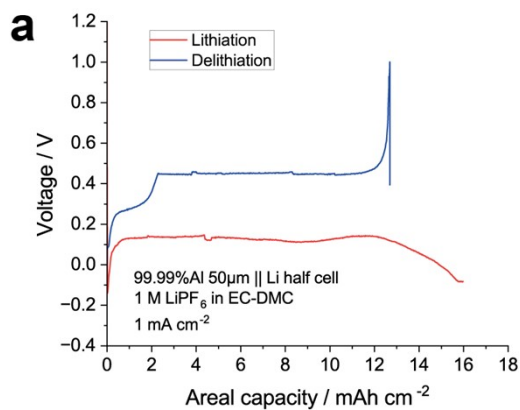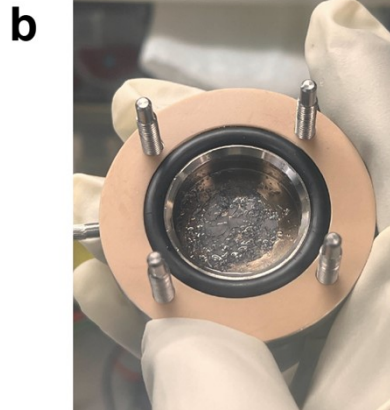

**Figure S1.** Structure degradation of Al-foil anodes with the absence of base layer. **(a)** Voltage profiles of a 50- $\mu\text{m}$ -thick 99.99%Al foil during entire lithiation and delithiation. **(b)** A photo of the Al-foil anode in the cell after the experiment. Due to the lack of a base layer, the aluminum foil fractured into pieces.

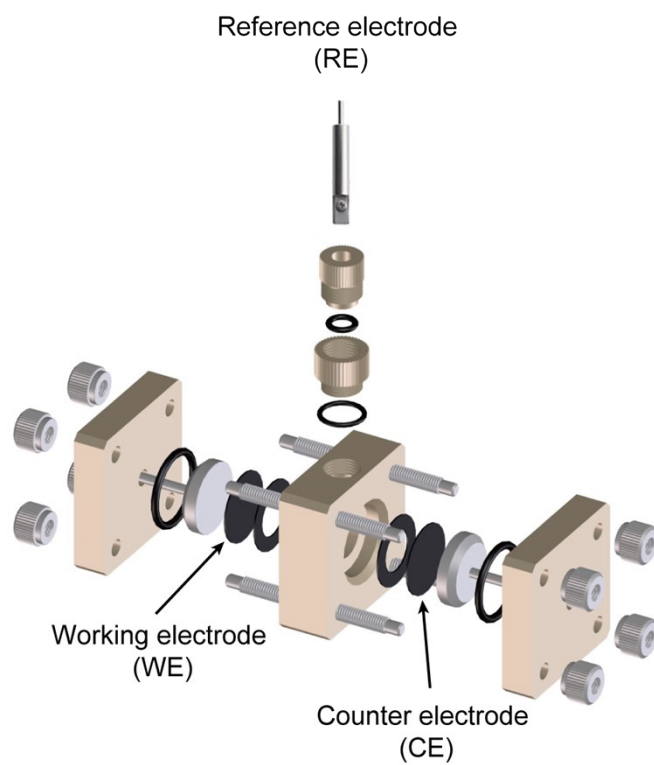

**Figure S2.** Structure of a three-electrodes batch cell (SB1A, EC-FRONTIER Co., Ltd.). The WE and CE has a have a diameter of 13 mm and are separated with a spacing of 5 mm without a separator.

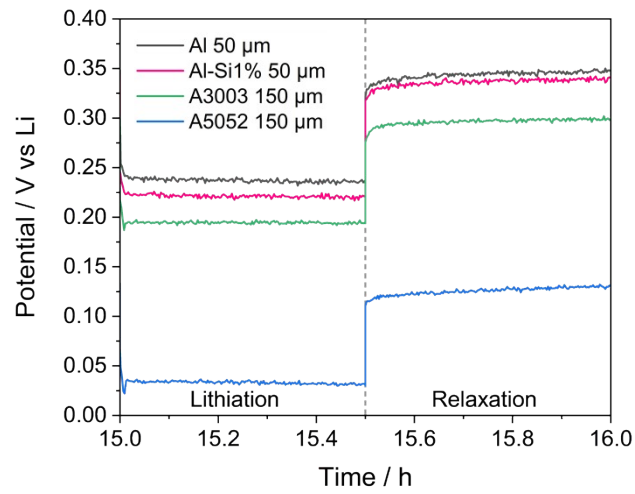

**Figure S3.** The fourth time of lithiation and relaxation in GITT measurements corresponds to Figure 4. The OCP potential of the Al-foil anodes increased quickly to a stable value. The difference between the OCP potentials and the theoretical electromotive force  $\sim 0.38$  V would be caused by the increase of the strain energy in LiAl phase.
